# Supplementary material for: Determining Protein Complex Connectivity Using a Probabilistic Deletion Network Derived from Quantitative Proteomics
Source: PubMed Central journal article supplement (PMC2751824; doi:10.1371/journal.pone.0007310), 2009-10-06
Supplement: pone.0007310.s003.pdf [file pone.0007310.s003.pdf]

The colors scale:  
0.00                      0.50                      1.00

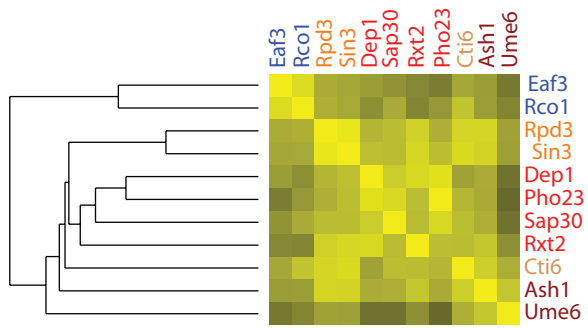

Supporting Figure 2. Sardu et al.
