# Supplementary material for: Determining Protein Complex Connectivity Using a Probabilistic Deletion Network Derived from Quantitative Proteomics
Source: PubMed Central journal article supplement (PMC2751824; doi:10.1371/journal.pone.0007310), 2009-10-06

A

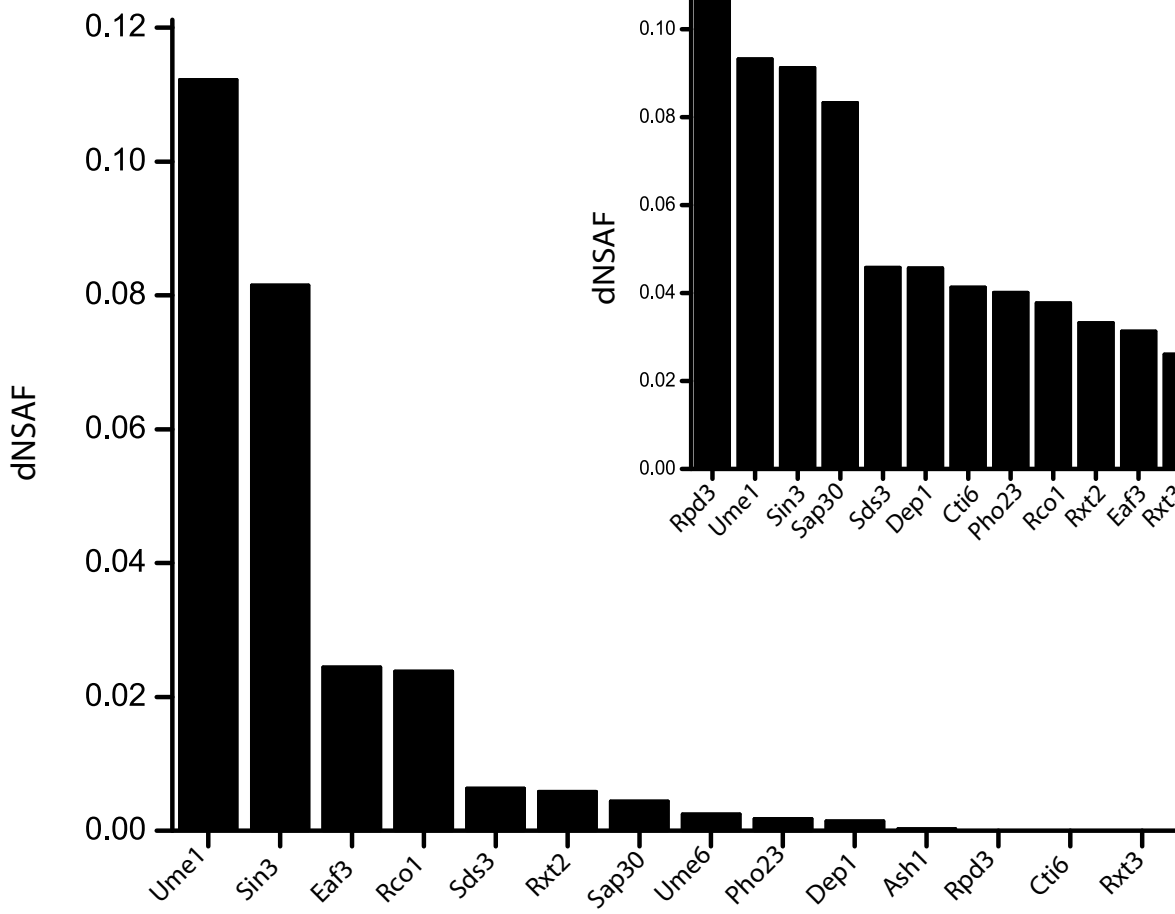

B

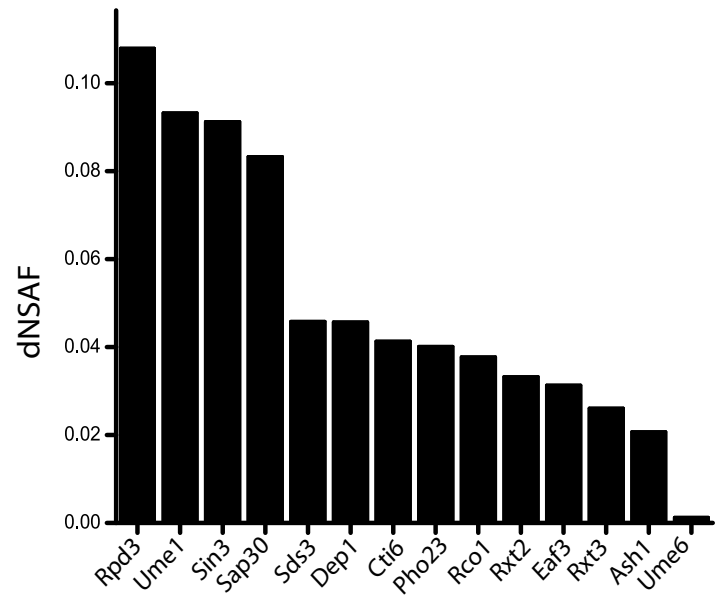

Supplement: pone.0007310.s004.pdf [file pone.0007310.s004.pdf]
