# Supplementary material for: Determining Protein Complex Connectivity Using a Probabilistic Deletion Network Derived from Quantitative Proteomics
Source: PubMed Central journal article supplement (PMC2751824; doi:10.1371/journal.pone.0007310), 2009-10-06
Supplement: pone.0007310.s005.pdf [file pone.0007310.s005.pdf]

The colors scale:  
0.00 0.0001 0.001 0.1 0.17

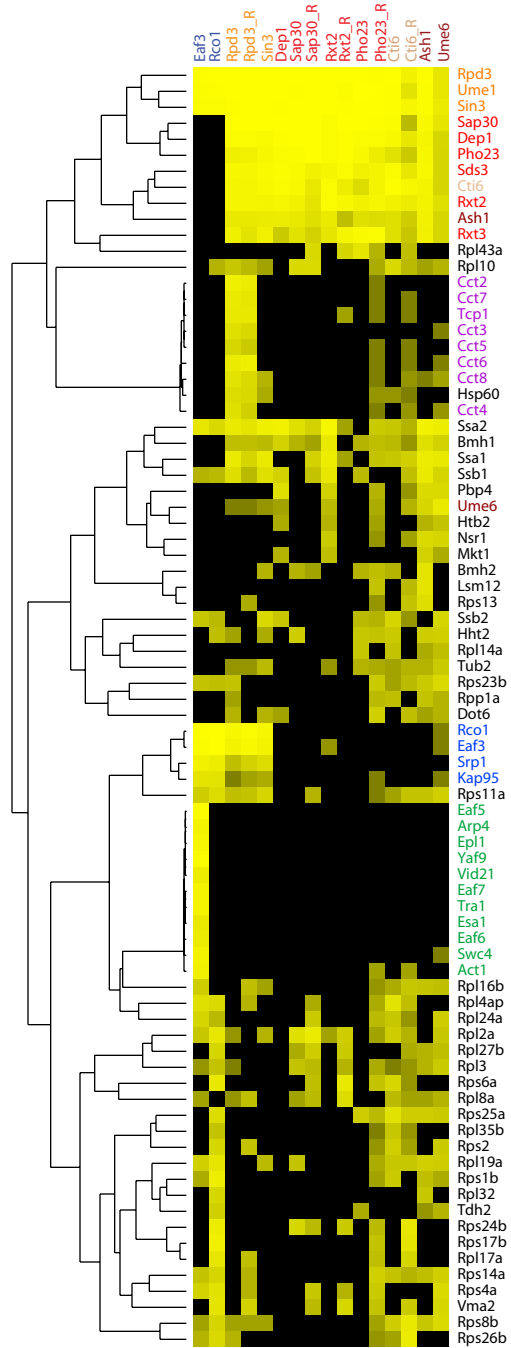

Supporting Figure 5. Sardu et al.
